# Supplementary material
Source: Springer Nature journal article supplement (https://www.springermedizin.de/resource/supplementary/12936_2010_1174_MOESM1_ESM.pdf/9550050)
Supplement: MOESM1 [file 9550050]

# MAP OF KWAMERA VILLAGE Wanron

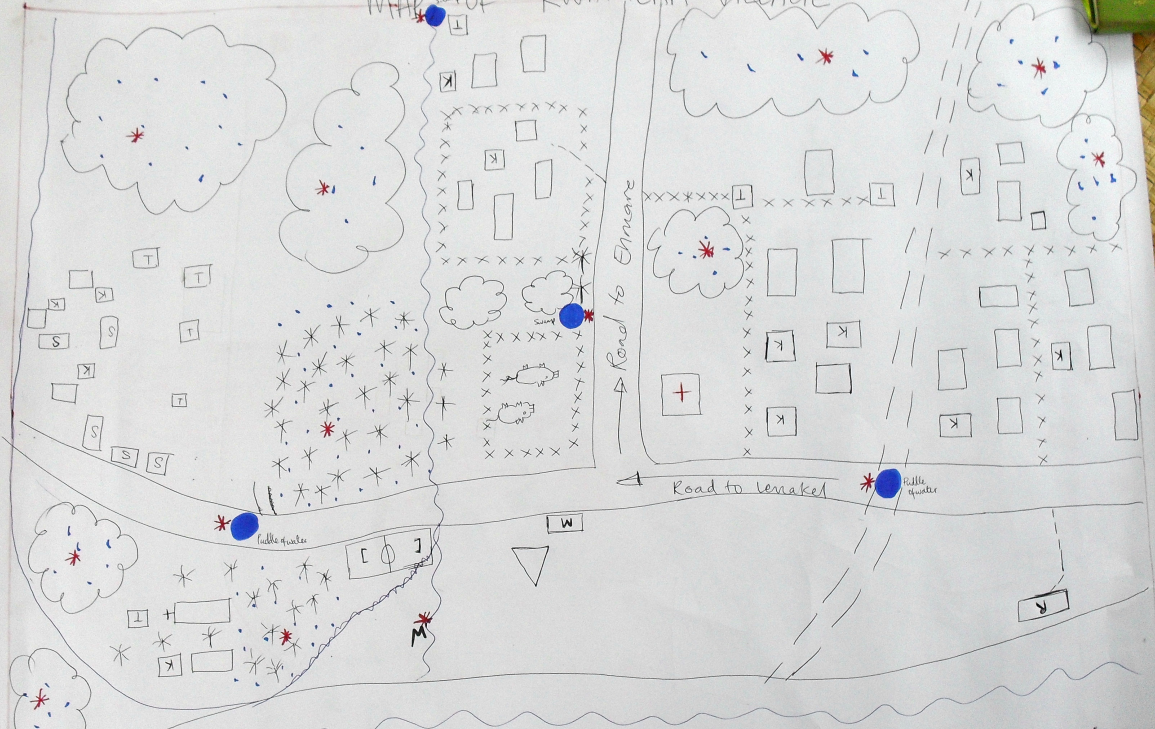

SEA

- |     |            |     |                    |     |                |               |                       |            |                       |
|-----|------------|-----|--------------------|-----|----------------|---------------|-----------------------|------------|-----------------------|
| [K] | hukon      | [+] | Church             | [+] | Adpost         | (cloud)       | Bush                  | (triangle) | Nakamal               |
| [T] | Tolot      | [+] | Sleeping           | [+] | and            | (line)        | Road                  | (circle)   | Boundary              |
| [S] | skad       | [+] | river              | [+] | tree           | (dashed line) | Swamp/puddle of water | (circle)   | Swamp/puddle of water |
| [R] | Rest house | [+] | coconut plantation | [+] | high rice spot | (dotted line) | High rice spot        | (circle)   | High rice spot        |
